# Supplementary material for: Using matrix metalloprotease-9 (MMP-9) to trigger supramolecular hydrogelation
Source: Royal Society of Chemistry journal article supplement (doi:10.1039/b908206a), 2009-01-01
Supplement: b908206a.pdf [file b908206a.pdf]

## Using Matrix Metalloprotease-9 (MMP-9) to Trigger Supramolecular Hydrogelation

Zhimou Yang, Manlung Ma, and Bing Xu\*

Electronic Supporting Information

*General.* Chemical reagents and solvents were used as received from commercial sources.  $^1\text{H}$  NMR spectra were obtained on a 300 MHz Varian XL-300 using  $\text{DMSO-}d_6$  as the solvent; Mass spectra were measured on Finnigan TSQ7000 System; HPLC analysis were performed on Waters 600E Multi-solvent Delivery System using XTerra MS  $\text{C}_{18}$  RP column with  $\text{CH}_3\text{CN}$  (0.1% of TFA) and water (0.1% of TFA) as the eluent. Transmission electron micrograph (TEM) was done on JEOL 2010 transmission electron microscope, operating at 200 kV. The rheology test was performed on Rheometrics ARES with a cone and a plate (25 mm diameter plate and 0.0999 rad cone angle), and the gap opening at the apex of the cone and plate was set to be 0.0483 mm. The cryo-dried samples were prepared as following: a copper grid coated with carbon was dipped into the hydrogel and placed into a vial, which was plunged into liquid nitrogen. Then, water was removed from the frozen specimen by a freeze-drier.

*Rheology experiment.* 0.6 mL of Gel **I** or Gel **II** was sandwiched between the cone and the plate to obtain the dynamic frequency curve at the strain of 0.5%. For the dynamic time sweep, 0.6 mL of solution of **1** containing MMP-9 was sandwiched between the cone and the plate at the frequency of 2 rad/s and strain of 0.5%. All rheological measurements were carried out at room temperature (25-26  $^{\circ}\text{C}$ ).

*Solid phase peptide synthesis:* peptides of **1** and **2** were synthesized by solid phase peptide synthesis using trityl chloride resin. The crude product was dissolved in DMSO and purified by HPLC.

$^1\text{H}$  NMR of FFFFCGLDD (**1**) (300MHz,  $\text{DMSO-}d_6$ )  $\delta$  (ppm): 8.77-8.82 (1H), 8.48-8.52 (3H), 8.02-8.14 (4H), 7.26-8.50 (22H), 4.72-4.80 (3H), 4.45-4.62 (3H), 4.10 (1H), 3.88 (2H), 3.50-3.60 (5H), 3.10-3.27 (3H), 2.82-3.04 (5H), 2.73-2.76 (2H), 2.58 (2H), 2.55-2.80 (3H), and 0.95-1.05 (6H). MS: calc.  $\text{M}^+$  = 1109.5, obsvd.  $(\text{M}+1)^+$  = 1110.5.

$^1\text{H}$  NMR of FFFFCG (**2**) (300MHz,  $\text{DMSO-}d_6$ )  $\delta$  (ppm): 8.70 (1H), 8.42-8.52 (4H), 7.25-7.50 (20H), 4.70-4.82 (3H), 4.60-4.70 (1H), 4.01 (1H), 3.92 (2H), and 2.88-3.25 (10H). MS: calc.  $\text{M}^+$  = 766.3, obsvd.  $(\text{M}+1)^+$  = 767.3.

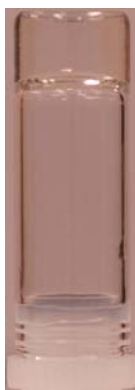

**Figure S-1.** Optical image of the hydrogel of **2** in water (0.35 wt%, pH = 7.4).

**Table S-1.** Eluting gradient for HPLC purifications of compound **1** and **2**.

| Time (minute) | Flow (ml/min.) | H <sub>2</sub> O % | CH <sub>3</sub> CN % |
|---------------|----------------|--------------------|----------------------|
| 0             | 5.0            | 100                | 0                    |
| 35            | 5.0            | 20                 | 80                   |
| 40            | 5.0            | 20                 | 80                   |
| 41            | 5.0            | 100                | 0                    |
| 45            | 5.0            | 100                | 0                    |
